# Supplementary material for: Psychotherapeutic and Psychosocial Interventions with Unaccompanied Minors: A Scoping Review
Source: MDPI journal article supplement (doi:10.3390/healthcare11060918), 2023-03-22
Supplement: s1 [file s1]

Table S1. *Detailed search strategy used for Scopus.*

|                                            |                                                          |
|--------------------------------------------|----------------------------------------------------------|
| <b>Database</b>                            | <b>Scopus</b>                                            |
| <b>Date</b>                                | <b>05/12/2021 and 26/08/2022</b>                         |
| <b>Strategy</b>                            | #1 AND #2 AND (#3 OR #4)                                 |
| #1<br><b>Concept:</b> Unaccompanied Minor  | unaccompanied AND (minor* OR child* OR adolescent*)      |
| #2<br><b>Concept:</b> Migrant              | refugee* OR migrant* OR immigrant*                       |
| #3<br><b>Concept:</b> Psychotherapy        | therap* OR psychotherap* OR counsel*                     |
| #4<br><b>Concept:</b> Psychosocial Support | (psychosocial OR social) AND (support* OR intervention*) |
