# Supplementary material for: Psychotherapeutic and Psychosocial Interventions with Unaccompanied Minors: A Scoping Review
Source: MDPI journal article supplement (doi:10.3390/healthcare11060918), 2023-03-22
Supplement: s1 [file s1]

Table S2. *Detailed search strategy used for PubMed.*

|                                            |                                                                                                                                                         |
|--------------------------------------------|---------------------------------------------------------------------------------------------------------------------------------------------------------|
| <b>Database</b>                            | <b>PubMed</b>                                                                                                                                           |
| <b>Date</b>                                | <b>05/12/2021 and 26/08/2022</b>                                                                                                                        |
| <b>Strategy</b>                            | #1 AND #2 AND #3 AND (#4 OR #5)                                                                                                                         |
| #1<br><b>Concept:</b> Unaccompanied        | unaccompanied [tw]                                                                                                                                      |
| #2<br><b>Concept:</b> Minor                | “Minors” [MeSH] OR “Child” [MeSH] OR<br>“Adolescent” [MeSH]                                                                                             |
| #3<br><b>Concept:</b> Migrant              | “Refugees” [MeSH] OR “Transients and Migrants”<br>[MeSH] OR “Emigrants and Immigrants” [MeSH] OR<br>“Undocumented Immigrants” [MeSH]                    |
| #4<br><b>Concept:</b> Psychotherapy        | “Therapeutics” [MeSH] OR “Psychotherapy” [MeSH]<br>OR “Counseling” [MeSH] OR “Psychological<br>Techniques” [MeSH] OR “Mental Health Recovery”<br>[MeSH] |
| #5<br><b>Concept:</b> Psychosocial Support | “Psychosocial Interventions” [MeSH] OR “Psychosocial<br>Support Systems” [MeSH] OR “Social Support” [MeSH]                                              |
