# Supplementary material for: Psychotherapeutic and Psychosocial Interventions with Unaccompanied Minors: A Scoping Review
Source: MDPI journal article supplement (doi:10.3390/healthcare11060918), 2023-03-22
Supplement: s1 [file s1]

Table S3. *Overview of the 46 studies on psychotherapeutic interventions*

| Author(s),<br>Year, Country                  | Type of<br>paper/study      | Type of<br>intervention                                                                  | Aim of<br>intervention | Setting                                                                                                             | Participants                                                                                                                                                                                                                                   | Measures<br>(if any)                                                     | Results (if any)                                                                                                                                                                    | Limitations                                                                                                                                                                                                                                                                                                                                                                                                                      |
|----------------------------------------------|-----------------------------|------------------------------------------------------------------------------------------|------------------------|---------------------------------------------------------------------------------------------------------------------|------------------------------------------------------------------------------------------------------------------------------------------------------------------------------------------------------------------------------------------------|--------------------------------------------------------------------------|-------------------------------------------------------------------------------------------------------------------------------------------------------------------------------------|----------------------------------------------------------------------------------------------------------------------------------------------------------------------------------------------------------------------------------------------------------------------------------------------------------------------------------------------------------------------------------------------------------------------------------|
| <u>Quantitative studies</u>                  |                             |                                                                                          |                        |                                                                                                                     |                                                                                                                                                                                                                                                |                                                                          |                                                                                                                                                                                     |                                                                                                                                                                                                                                                                                                                                                                                                                                  |
| <b>CBT-based interventions</b>               |                             |                                                                                          |                        |                                                                                                                     |                                                                                                                                                                                                                                                |                                                                          |                                                                                                                                                                                     |                                                                                                                                                                                                                                                                                                                                                                                                                                  |
| Ehnholt et al.<br>(2005), UK                 | RCT                         | School-based CBT<br>Manualized<br>Group<br>6 weekly sessions                             | Trauma<br>improvement  | Secondary schools<br>Sessions conducted by<br>EMAG teachers                                                         | 26 asylum-seeking/<br>refugee children (9 F)<br>CBT: n=15 (2 UAMs)<br><u>Control</u> : n=11 (4 UAMs)<br>11-15 years old<br>Kosovo, Sierra Leone,<br>Turkey (Kurdish),<br>Afghanistan, Somalia<br>Psychological and<br>behavioural difficulties | R-IES, DSRS<br>RCMAS, WTQ<br>SDQ                                         | Significant decrease in<br>PTSD**, intrusive<br>symptoms**, behavioural<br>difficulties* and emotional<br>symptoms*                                                                 | Small sample size<br>Mainly male participants<br>Not randomly recruited<br>Limited generalizability<br>Loss to follow-up<br>Only self-report measures<br>R-IES and DSRS not culturally<br>validated<br>Conflicting data on cultural validity<br>of SDQ<br>No comparison with placebo or<br>another intervention<br>Effects not demonstrated<br>by different investigators                                                        |
| Pfeiffer &<br>Goldbeck<br>(2017),<br>Germany | Uncontrolled<br>pilot study | "Mein Weg"<br>Trauma Focused<br>Intervention<br>Manualized<br>Group<br>6 weekly sessions | Trauma<br>improvement  | Collaboration with<br>child welfare agencies<br>Sessions conducted by<br>trained social workers                     | 29 UAMs (M)<br>14-18 years old<br>Mainly Afghanistan<br>Mild to moderate PTSS                                                                                                                                                                  | CATS                                                                     | Significant decrease in<br>PTSS**, re-experiencing**,<br>avoidance*, negative<br>alterations in cognition and<br>mood**                                                             | Small sample size<br>Only male participants<br>Approx. 50% from one country<br>Strict inclusion criteria<br>Not randomly recruited<br>Limited generalizability<br>Only self-report PTSS measures<br>Conflicting data on cultural validity<br>of CATS<br>Only analysis of complete data<br>No control group<br>No comparison with placebo or<br>another intervention<br>No independent intervention<br>assessment<br>No follow-up |
| Pfeiffer et al.<br>(2018),<br>Germany        | RCT                         | "Mein Weg"<br>Trauma Focused<br>Intervention<br>Manualized<br>Group<br>6 weekly sessions | Trauma<br>improvement  | Collaboration with<br>child and adolescent<br>welfare programmes<br>Sessions conducted by<br>trained social workers | <u>Mein Weg</u> : n=47<br>(UAMs, 3F)<br>37 attended all sessions<br><u>Usual Care</u> : n=49<br>(48 UAMs, 1 AM, 4F)<br>45 attended all sessions<br>13-19 years old<br>Middle East, Africa<br>At least moderately<br>severe PTSS                | CATS-Self<br>CATS-Care<br>PHQ-8, CPTCI-S<br>Socio-demographic<br>factors | Significant improvement of<br>self-reported PTSS** and<br>depression**, but not of<br>caregiver-reported symptoms<br>and self-reported<br>dysfunctional posttraumatic<br>cognitions | Mainly male participants<br>Approx. 50% from one country<br>Strict inclusion criteria<br>Not randomly recruited<br>Limited generalizability<br>Spill-over effects within the<br>participating sites<br>Possible bias of social workers in<br>Usual Care group, due to training<br>Intervention fidelity based solely<br>on self-reports<br>Conflicting data on cultural validity                                                 |

|                                        |                                                           |                                                                                                                  |                    |                                                                                                                                                  |                                                                                                                                                     |                                                                                                                                     |                                                                                                                                                                                                                                                                                                                                                                                                                      |                                                                                                                                                                                                                                                                                                                                                                                                                                                                                                                                                                                                                                                                                                                                                                                                                                                                                                          |
|----------------------------------------|-----------------------------------------------------------|------------------------------------------------------------------------------------------------------------------|--------------------|--------------------------------------------------------------------------------------------------------------------------------------------------|-----------------------------------------------------------------------------------------------------------------------------------------------------|-------------------------------------------------------------------------------------------------------------------------------------|----------------------------------------------------------------------------------------------------------------------------------------------------------------------------------------------------------------------------------------------------------------------------------------------------------------------------------------------------------------------------------------------------------------------|----------------------------------------------------------------------------------------------------------------------------------------------------------------------------------------------------------------------------------------------------------------------------------------------------------------------------------------------------------------------------------------------------------------------------------------------------------------------------------------------------------------------------------------------------------------------------------------------------------------------------------------------------------------------------------------------------------------------------------------------------------------------------------------------------------------------------------------------------------------------------------------------------------|
| Pfeiffer et al. (2019), Germany        | RCT<br>Secondary analysis of Pfeiffer et al. (2018) study | "Mein Weg"<br>Trauma Focused Intervention<br>Manualized Group<br>6 weekly sessions                               | Trauma improvement | Collaboration with child welfare agencies<br>Sessions conducted by trained social workers                                                        | <u>Mein Weg</u> : 47 UAMs(3F)<br>37 attended all sessions<br>14-19 years old<br>Middle East, Africa<br>At least moderately severe PTSS              | CATS-Self<br>CATS-Care<br>PHQ-8, CPTCI-S<br>Socio-demographic factors                                                               | Country of origin significant predictor of change in PTSS*, baseline levels of depression significant predictor of change in depression***<br>Sustainability of treatment effects in self-reported PTSS pre to post intervention*** and post to 3-month follow up*, and depression pre to post intervention***<br>Reduction of mental health symptomatology, but not improvement in self-efficacy (descriptive data) | of CATS<br>Further follow-up needed<br>Mainly male participants<br>Approx. 50% of the sample from one country<br>Strict inclusion criteria<br>Not randomly recruited<br>Limited generalizability<br>Conflicting data on cultural validity of CATS<br>No independent intervention assessment<br>Loss to follow-up<br>No long-term follow-up<br>Recruitment difficulties<br>Small sample size<br>Mainly male participants<br>Only from two countries<br>Not randomly recruited<br>Limited generalizability<br>Partial randomisation (n=3)<br>No comparison with placebo or another intervention<br>Loss to follow-up<br>Only 5 UAMs completed all three data collection points<br>CRIES-13 and CLS not culturally validated<br>Further follow-up needed<br>Possible recruitment difficulties<br>Strict inclusion criteria<br>Conflicting data on cultural validity of CATS<br>SSQ not culturally validated |
| Rondung et al. (2022), Sweden          | RCT pilot study                                           | TF-CBT<br>Teaching recovery techniques<br>Manualized Group<br>7 weekly sessions                                  | Trauma improvement | Collaboration between two Swedish universities<br>Recruitment from community services<br>Sessions conducted by TRT-trained research team members | 15 UAMs (2F)<br><u>TRT</u> : n=14<br>6 attended ≥ 4 sessions<br><u>Waitlist control</u> : n=1<br>16-20 years old<br>Afghanistan, Eritrea<br>PTSD    | CRIS-13, GSE<br>PHQ-9, GAD-7<br>CLS, RTHC, CHU-9D, TiC-P, C-SSRS                                                                    |                                                                                                                                                                                                                                                                                                                                                                                                                      |                                                                                                                                                                                                                                                                                                                                                                                                                                                                                                                                                                                                                                                                                                                                                                                                                                                                                                          |
| Rosner et al. (2020), Germany          | RCT study protocol                                        | TF-CBT/"Mein Weg"<br>Manualized Group/Individual<br>Mein Weg: 9 group sessions<br>TF-CBT: 18 individual sessions | Trauma improvement | Collaboration with Child and Youth Welfare Services, private practices and outpatient clinics – Sessions will be conducted by therapists         | 540 UAMs<br>12-20 years old<br>PTSD                                                                                                                 | CATS-2, PHQ-9<br>GAD-7, AUDIT<br>WHOQOL-BREF<br>EQ-5D-3L, CYWS<br>GCIC, BAOS, SSQ<br>DSSYR, CUDIT-R<br>BSAS, HoNOSCA<br>CAMHSRI-REF |                                                                                                                                                                                                                                                                                                                                                                                                                      |                                                                                                                                                                                                                                                                                                                                                                                                                                                                                                                                                                                                                                                                                                                                                                                                                                                                                                          |
| Sarkadi et al. (2020), Sweden          | RCT study protocol                                        | TF-CBT<br>Teaching recovery techniques<br>Manualized Group<br>5 weekly youth sessions, 2 caregiver sessions      | Trauma improvement | Collaboration with community services – Sessions will be conducted by TRT-trained "group leaders"                                                | 218 UAMs<br><u>TRT</u> : 109 UAMs<br><u>Control</u> : 109 UAMs<br>14-20 years old<br>PTSD symptoms                                                  | CRIS-13, PHQ-9<br>GAD-7, GSE<br>CLS, Demographics questionnaire<br>RTHC, CHU-9D<br>TiC-P, C-SSRS                                    |                                                                                                                                                                                                                                                                                                                                                                                                                      | Possible recruitment difficulties<br>Strict inclusion criteria<br>Only self-report measures<br>CRIES-13 and CLS not culturally validated                                                                                                                                                                                                                                                                                                                                                                                                                                                                                                                                                                                                                                                                                                                                                                 |
| Unterhitzberger et al. (2019), Germany | Uncontrolled pilot study                                  | TF-CBT<br>Manualized Individual<br>15 weekly sessions                                                            | Trauma improvement | University Psychotherapy Outpatient Clinic<br>Sessions conducted by therapists                                                                   | 26 UAMs (M)<br>19 attended all sessions<br>15-19 years old<br>Afghanistan<br>PTSD, depression, behavioural and somatic symptoms<br>Accompanied by a | CATS<br>Kinder-DIPS<br>MFQ<br>SDQ<br>PHQ-15                                                                                         | Significant decrease in self-reported PTSS**, caregiver-reported PTSD***, depressive symptoms***, behavioural problems** and physical complaints*                                                                                                                                                                                                                                                                    | Small sample size<br>Only male participants<br>Approx. 75% from one country<br>Strict inclusion criteria<br>Not randomly recruited<br>Limited generalizability<br>No control group<br>No comparison with placebo or                                                                                                                                                                                                                                                                                                                                                                                                                                                                                                                                                                                                                                                                                      |

|                                   |                    |                                                                                                                               |                                              |                                                                                                                              |                                                                                                                                               |                                                                                                                                                                                  |                                                                                                                                                                                                                                                                                                                                                                                                      |                                                                                                                                                                                                                                                                                                                                                                                                                                                                                                                                                                                                                                                                 |
|-----------------------------------|--------------------|-------------------------------------------------------------------------------------------------------------------------------|----------------------------------------------|------------------------------------------------------------------------------------------------------------------------------|-----------------------------------------------------------------------------------------------------------------------------------------------|----------------------------------------------------------------------------------------------------------------------------------------------------------------------------------|------------------------------------------------------------------------------------------------------------------------------------------------------------------------------------------------------------------------------------------------------------------------------------------------------------------------------------------------------------------------------------------------------|-----------------------------------------------------------------------------------------------------------------------------------------------------------------------------------------------------------------------------------------------------------------------------------------------------------------------------------------------------------------------------------------------------------------------------------------------------------------------------------------------------------------------------------------------------------------------------------------------------------------------------------------------------------------|
|                                   |                    |                                                                                                                               |                                              |                                                                                                                              | caregiver/social worker                                                                                                                       |                                                                                                                                                                                  |                                                                                                                                                                                                                                                                                                                                                                                                      | another intervention<br>Conflicting data on cultural validity of CATS and SDQ<br>Kinder-DIPS not culturally validated<br>Language barriers<br>Loss to follow-up<br>Small sample size<br>Mainly male participants<br>Approx. 75% from one country<br>Not randomly recruited<br>Limited generalizability<br>No control group<br>No comparison with placebo or another intervention<br>No manual<br>CRIES-13 not culturally validated<br>Language barriers<br>Missing data<br>Many sessions did not contain the planned treatment-Difficulty in impact assessment<br>No independent intervention assessment<br>Selective recruitment of therapists<br>No follow-up |
| Van Es et al. (2021), Netherlands | Uncontrolled study | Multimodal approach:<br>TF-CBT, KidNET, EMDR<br>Individual<br>4-17 sessions                                                   | Trauma improvement                           | Collaboration with the national guardianship institution for UAMs and separated children<br>Sessions conducted by therapists | 41 UAMs (14F)<br>17 attended all sessions<br>12-19 years old<br>Eritrea, Syria, Afghanistan<br>PTSD, depression                               | CRIES-13, PHQ-A<br>Demographics<br>Request for help<br>Life events<br>(KidNET lifeline)<br>Programme integrity (exposure and adherence calculation)<br>Feasibility questionnaire | Adjustments made to treatment protocol; factors limiting the approach feasibility were identified; significant decrease in PTSD symptoms (T1 to T3***); non-significant change in depression symptoms                                                                                                                                                                                                | Small sample size<br>Mainly male participants<br>Approx. 75% from one country<br>Not randomly recruited<br>Limited generalizability<br>No control group<br>No comparison with placebo or another intervention<br>No manual<br>CRIES-13 not culturally validated<br>Language barriers<br>Missing data<br>Many sessions did not contain the planned treatment-Difficulty in impact assessment<br>No independent intervention assessment<br>Selective recruitment of therapists<br>No follow-up                                                                                                                                                                    |
| Walg et al. (2020), Germany       | RCT                | Multimodal approach:<br>CBT, DBT, TPT<br>Stabilisation<br>Training for Trauma Induced Disorders<br>Group<br>6 weekly sessions | Trauma improvement                           | Inpatient Youth Welfare Facilities<br>Sessions conducted by two educational staff members                                    | 49 UAMs (M)<br><u>Intervention</u> : n=23<br><u>Control</u> : n=26<br>15-18 years old<br>Mainly from Afghanistan and Syria<br>Mental distress | BSCL<br>CBCL6-18/R                                                                                                                                                               | Reduction of self-reported mental distress in intervention group**<br>Reduction of externally assessed mental distress in both groups*                                                                                                                                                                                                                                                               | Small sample size<br>Only male participants<br>Approx. 50% from one country<br>Strict inclusion criteria<br>Not randomly recruited<br>Limited generalizability<br>Attendance rates varied<br>No comparison with placebo or another intervention<br>No manual<br>BSCL not culturally validated<br>Further follow-up needed                                                                                                                                                                                                                                                                                                                                       |
| <b>Art-based interventions</b>    |                    |                                                                                                                               |                                              |                                                                                                                              |                                                                                                                                               |                                                                                                                                                                                  |                                                                                                                                                                                                                                                                                                                                                                                                      |                                                                                                                                                                                                                                                                                                                                                                                                                                                                                                                                                                                                                                                                 |
| DeMott et al. (2017), Norway      | Controlled study   | Expressive Arts In Transition (EXIT)<br>Manualized<br>Group<br>10 sessions (2 per week)                                       | Trauma improvement<br>Promotion of wellbeing | Arrival Centre for UAMs and other refugee facilities –<br>Sessions conducted by therapists                                   | 143 UAMs (M)<br>EXIT: 70 UAMs<br>LAU: 73 UAMs<br>15-18 years old<br>Afghanistan, Somalia, Iran, Western Sahara, Palestine, Algeria            | SLE, HSCL-25<br>HTQ, CLS                                                                                                                                                         | - <u>Post-traumatic symptoms</u> : Significant time by group interaction*<br>- <u>General distress</u> : No significant findings<br>- <u>Life satisfaction</u> : Significant time by group interaction* and group differences at T2*, T4*** and T5**<br>EXIT- significant increases in time (T1 to T3*, T4***, T5*** and T2 to T4**, T5** and T3 to T4*, T5*)<br><u>Expected life satisfaction</u> : | Only male participants<br>Mainly from two countries<br>Not randomly recruited<br>Limited generalizability<br>Partial randomisation<br>Loss to follow-up<br>Only self-report measures<br>SLE and CLS not culturally validated                                                                                                                                                                                                                                                                                                                                                                                                                                    |

| Systemic interventions                                            |                             |                                                                                                                         |                              |                                                                                                                    |                                                                                                                                                                     |                                                                                                                       | Significant group differences at T4* and T5**                                                                                                                                                                                                                                                                                                                                                                                                                                                                                                                                                                                                                                                                                                                                                                                                |
|-------------------------------------------------------------------|-----------------------------|-------------------------------------------------------------------------------------------------------------------------|------------------------------|--------------------------------------------------------------------------------------------------------------------|---------------------------------------------------------------------------------------------------------------------------------------------------------------------|-----------------------------------------------------------------------------------------------------------------------|----------------------------------------------------------------------------------------------------------------------------------------------------------------------------------------------------------------------------------------------------------------------------------------------------------------------------------------------------------------------------------------------------------------------------------------------------------------------------------------------------------------------------------------------------------------------------------------------------------------------------------------------------------------------------------------------------------------------------------------------------------------------------------------------------------------------------------------------|
| Ochoa de Alda<br>Martinez de<br>Apellaniz et al.<br>(2009), Spain | Uncontrolled<br>pilot study | Systemic<br>Group<br>10 sessions                                                                                        | Mental health<br>improvement | Collaboration with<br>NGO that manages<br>foster homes<br>Sessions conducted by<br>two Family Therapists           | 12 UAMs (M)<br>12-14 years old<br>Morocco<br>Depression, alexithymia,<br>low self-esteem                                                                            | CDS, RSE, TAS-20<br>Ad hoc<br>questionnaire<br>(satisfaction with<br>family relationships)                            | Significant decrease in<br>alexithymia and depression<br>scores***<br>Significant increase in self-<br>esteem***<br><br>Small sample size<br>All participants from the same<br>country<br>Not randomly recruited<br>Limited generalizability<br>Only self-report measures<br>No PTSD measures<br>No control group<br>No comparison with placebo or<br>another intervention<br>Effects not demonstrated by two<br>different investigators<br>No follow-up                                                                                                                                                                                                                                                                                                                                                                                     |
| <hr/>                                                             |                             |                                                                                                                         |                              |                                                                                                                    |                                                                                                                                                                     |                                                                                                                       |                                                                                                                                                                                                                                                                                                                                                                                                                                                                                                                                                                                                                                                                                                                                                                                                                                              |
| Mixed-method studies                                              |                             |                                                                                                                         |                              |                                                                                                                    |                                                                                                                                                                     |                                                                                                                       |                                                                                                                                                                                                                                                                                                                                                                                                                                                                                                                                                                                                                                                                                                                                                                                                                                              |
| CBT-based interventions                                           |                             |                                                                                                                         |                              |                                                                                                                    |                                                                                                                                                                     |                                                                                                                       |                                                                                                                                                                                                                                                                                                                                                                                                                                                                                                                                                                                                                                                                                                                                                                                                                                              |
| Sarkadi et al.<br>(2018), Sweden                                  | Uncontrolled<br>study       | TF-CBT<br>Teaching recovery<br>techniques<br>Manualized<br>Group<br>5 weekly youth<br>sessions, 2<br>caregiver sessions | Trauma<br>improvement        | Collaboration with<br>community and health<br>services<br>Sessions conducted by<br>trained members of the<br>staff | 46 UAMs (3F)<br>10 groups<br>14-18 years old<br>Mainly Afghanistan &<br>Syria<br>PTSD                                                                               | CRIES-8, MADR-S<br>Interviews                                                                                         | Significant reduction in<br>PTSD* and depression<br>symptoms***<br>URMs with suicidal ideation<br>were more likely to report<br>reduced depression<br>symptoms*<br>22% UAMs were classified<br>as recovered on PTSD<br>symptoms and 33% on<br>depression symptoms<br><u>Qual. data:</u> Supported by the<br>group, normalisation of<br>experiences, valuable tools<br>for daily life, making sense<br>of what happened, managing<br>feelings/having control,<br>finding meaning/looking to<br>the future<br><br>Small sample size<br>Mainly male participants from two<br>countries<br>Not randomly recruited<br>Limited generalizability<br>No control group<br>No comparison with placebo or<br>another treatment<br>Only self-report measures, possible<br>effects of educational level<br>CRIES-8 and MADR-S not<br>culturally validated |
| Scheiber et al.<br>(2019), Austria                                | RCT pilot<br>study          | CBT<br>Preventive<br>resilience training<br>Group<br>6 sessions                                                         | Mental health<br>improvement | Refugee camp<br>Sessions conducted by<br>mental health<br>professionals trained in<br>trauma therapy               | 55 UAMs (M)<br><u>Intervention:</u> n=18<br>(n=17 randomised)<br><u>Control:</u> n=37<br>14-17 years old<br>Afghanistan, Pakistan<br>Two interpreters<br>Caregivers | PROTECT<br>Questionnaire<br>RHS-15<br>Several single-item<br>questions, including<br>general well-being<br>Interviews | Improvement of general<br>wellbeing*<br>No significant decrease in<br>trauma-related symptoms<br><u>Qual. data:</u> Psychoeducation,<br>group activities and mutual<br>support as sources of relief<br><br>Small sample size<br>Only male participants<br>Mainly from one country<br>Not randomly recruited<br>Limited generalizability<br>Partial randomisation<br>No comparison with placebo or<br>another intervention<br>Only self-report measures<br>No culturally validated measures<br>No follow-up                                                                                                                                                                                                                                                                                                                                   |
| Van der Gucht<br>et al. (2019),                                   | Uncontrolled<br>pilot study | Mindfulness<br>Manualized                                                                                               | Mental health<br>improvement | Shelter for UAMs<br>Sessions conducted by                                                                          | 13 UAMs (5F)<br>9 attended all sessions                                                                                                                             | I-PANAS-SF<br>CRIES                                                                                                   | Significant decrease in<br>negative affect* and<br><br>Small sample size<br>Not randomly recruited                                                                                                                                                                                                                                                                                                                                                                                                                                                                                                                                                                                                                                                                                                                                           |

|                                   |                             |                                                                                                                                                                                                   |                                                                                  |                                                                                                                                                              |                                                                                                                                                                            |                                                                                                                                                   |                                                                                                                                                                                                                                                                                                                                                                                                                                  |                                                                                                                                                                                                                                                                                                                                                                                                                                                                                                                                                                                                 |
|-----------------------------------|-----------------------------|---------------------------------------------------------------------------------------------------------------------------------------------------------------------------------------------------|----------------------------------------------------------------------------------|--------------------------------------------------------------------------------------------------------------------------------------------------------------|----------------------------------------------------------------------------------------------------------------------------------------------------------------------------|---------------------------------------------------------------------------------------------------------------------------------------------------|----------------------------------------------------------------------------------------------------------------------------------------------------------------------------------------------------------------------------------------------------------------------------------------------------------------------------------------------------------------------------------------------------------------------------------|-------------------------------------------------------------------------------------------------------------------------------------------------------------------------------------------------------------------------------------------------------------------------------------------------------------------------------------------------------------------------------------------------------------------------------------------------------------------------------------------------------------------------------------------------------------------------------------------------|
| Belgium                           | Group<br>8 weekly sessions  |                                                                                                                                                                                                   |                                                                                  | two Mindfulness<br>trainers                                                                                                                                  | 3 groups<br>13-18 years old<br>Afghanistan, Albania,<br>Syria, Russia, Bosnia,<br>Angola, Pakistan,<br>Rwanda, Somalia<br>No current severe mental<br>illness              | Semi-structured<br>interviews                                                                                                                     | symptoms of depression*<br>Significant increase in<br>positive affect*<br><u>Qual. data:</u><br><i>Expectations:</i> reducing stress<br>and trauma-related symptoms<br>and social integration<br><i>Experiences:</i> concerns about<br>the format, duration and<br>language of the program<br><i>Integration:</i> mindfulness<br>exercises used as a new<br>coping strategy in<br>combination with familiar<br>coping strategies | Limited generalizability<br>No control group<br>No comparison with placebo or<br>another intervention<br>Only self-report measures<br>Conflicting data on cultural validity<br>of I-PANAS-SF<br>CRIES not culturally validated<br>Organisational and practical issues<br>High attrition rate<br>No further follow-up                                                                                                                                                                                                                                                                            |
| <b>Narrative Exposure Therapy</b> |                             |                                                                                                                                                                                                   |                                                                                  |                                                                                                                                                              |                                                                                                                                                                            |                                                                                                                                                   |                                                                                                                                                                                                                                                                                                                                                                                                                                  |                                                                                                                                                                                                                                                                                                                                                                                                                                                                                                                                                                                                 |
| Said & King<br>(2020), UK         | Uncontrolled<br>pilot study | NET<br>Individual<br>9-20 sessions                                                                                                                                                                | Trauma<br>improvement                                                            | NHS, CAMHS for<br>people from refugee<br>backgrounds<br>Sessions conducted by<br>final-year clinical<br>psychology doctoral<br>trainees under<br>supervision | 4 UAMs (1F)<br>3 attended all sessions<br>16-17 years old<br>Sudan, Vietnam, Albania<br>Suicidal ideation, self-<br>harming, PTSD                                          | CRIES-8, CPSS-5<br>Semi-structured<br>interviews                                                                                                  | 2 UAMs' symptom<br>scores were below the<br>clinical range for PTSD post-<br>treatment<br>3 UAMs showed reliable<br>improvement<br>2 no longer engaged in self-<br>harming behaviour<br>None reported suicidal<br>ideation post-treatment<br><u>Qual. data:</u> Improved<br>concentration, fewer<br>intrusive memories, less<br>distress, increased cohesion<br>and sense-making                                                 | Small sample size<br>Mainly male participants<br>Not randomly recruited<br>Limited generalizability<br>No control group<br>No comparison with placebo or<br>another intervention<br>Possible effects of other<br>interventions implemented<br>alongside NET<br>Only self-report measures<br>Only PTSD measures<br>No culturally validated measures<br>Incomplete outcome data for one<br>participant<br>No follow-up                                                                                                                                                                            |
| <b>Other interventions</b>        |                             |                                                                                                                                                                                                   |                                                                                  |                                                                                                                                                              |                                                                                                                                                                            |                                                                                                                                                   |                                                                                                                                                                                                                                                                                                                                                                                                                                  |                                                                                                                                                                                                                                                                                                                                                                                                                                                                                                                                                                                                 |
| Garoff et al.<br>(2019), Finland  | Uncontrolled<br>pilot study | Multimodal<br>approach:<br>Phase-based<br>approach of<br>trauma care, IASC<br>Guidelines for<br>MHPSS<br>Manualized<br>Individual/Group<br>10 weekly group<br>sessions and<br>individual sessions | Trauma<br>improvement<br>Mental health<br>improvement<br>Professionals' training | Accommodation<br>facilities<br>Implementation by<br>mental health<br>professionals and staff<br>members, consultation<br>by the research team                | 18 UAMs (2F)<br>Group: n=17<br>Individual: n=1<br>9-17 years old<br>Mainly Afghanistan and<br>Iraq<br>PTSD symptoms<br>9 staff members<br>2 mental health<br>professionals | Semi-structured<br>interviews<br>Focus Group<br>Discussions<br>Brief ethnographic<br>interviewing<br>Resilience self-rated<br>scale<br>CRIES, SDQ | No significant changes in<br>mental health symptoms<br><u>Qual. data:</u> Increased trust<br>and communication,<br>empowerment for group<br>facilitation                                                                                                                                                                                                                                                                         | Difficulties in recruitment and<br>group formation<br>Small sample size<br>Mainly male participants from two<br>countries<br>Not randomly recruited<br>Limited generalizability<br>No control group<br>No comparison with placebo or<br>another intervention<br>Possible effects of ongoing<br>medication in some participants<br>Only self-report measures<br>Conflicting data on cultural validity<br>of SDQ<br>CRIES not culturally validated<br>Difficulties in the completion of the<br>self-rated questionnaires in a group<br>setting (comprehension difficulties<br>and social anxiety) |

Talking about difficult issues in a group setting not appealing for some participants  
 Variations in understanding and responding to interview questions were not systematically recorded  
 No follow-up

## Qualitative studies

### CBT-based interventions

|                                          |                  |                                                                                                                                                              |                                                       |                                                                                                                                                                                                                                                                      |                                      |                                                                                   |                                                                                                     |                                                                                                                                                                                                                                                                                                                                                                                             |
|------------------------------------------|------------------|--------------------------------------------------------------------------------------------------------------------------------------------------------------|-------------------------------------------------------|----------------------------------------------------------------------------------------------------------------------------------------------------------------------------------------------------------------------------------------------------------------------|--------------------------------------|-----------------------------------------------------------------------------------|-----------------------------------------------------------------------------------------------------|---------------------------------------------------------------------------------------------------------------------------------------------------------------------------------------------------------------------------------------------------------------------------------------------------------------------------------------------------------------------------------------------|
| Unterhitzenberger et al. (2021), Germany | Content analysis | TF-CBT<br>Manualized<br>Training and supervision for therapists working with UAMs in a pilot study – see Unterhitzenberger et al. (2019)<br>Individual/Group | Professionals' training<br>Improvement of the therapy | University<br>Psychotherapy<br>Outpatient Clinic<br>TF-CBT training and biweekly supervision by a certified trainer<br>Monthly case consultation by manual developers<br>Half-day training session by an expert in psychotherapy with refugees and torture survivors | 9 therapists (8F)<br>29-60 years old | Session checklist for the TF-CBT modules<br>Survey for each case after completion | Adjustments made to treatment protocol, few obstacles identified, few manual was considered helpful | Small sample size<br>Not randomly recruited<br>Limited generalizability<br>No control group<br>No comparison with placebo or another intervention<br>Possible bias in question phrasing<br>No calculation of interrater reliability scores<br>Lack of objective ratings<br>No previous assessment of the therapists' cultural competence<br>No assessment of UAMs' feedback<br>No follow-up |
|------------------------------------------|------------------|--------------------------------------------------------------------------------------------------------------------------------------------------------------|-------------------------------------------------------|----------------------------------------------------------------------------------------------------------------------------------------------------------------------------------------------------------------------------------------------------------------------|--------------------------------------|-----------------------------------------------------------------------------------|-----------------------------------------------------------------------------------------------------|---------------------------------------------------------------------------------------------------------------------------------------------------------------------------------------------------------------------------------------------------------------------------------------------------------------------------------------------------------------------------------------------|

### Narrative Exposure Therapy

|                        |                                                       |                                    |                    |                                                                                              |                                                                   |                            |                                                                                                                                                   |                                                                                                                                                                                                                                                                                                                                                                                                                                   |
|------------------------|-------------------------------------------------------|------------------------------------|--------------------|----------------------------------------------------------------------------------------------|-------------------------------------------------------------------|----------------------------|---------------------------------------------------------------------------------------------------------------------------------------------------|-----------------------------------------------------------------------------------------------------------------------------------------------------------------------------------------------------------------------------------------------------------------------------------------------------------------------------------------------------------------------------------------------------------------------------------|
| Said et al. (2021), UK | IPA<br>Further analysis of Said & King's (2020) study | NET<br>Individual<br>9-20 sessions | Trauma improvement | NHS, CAMHS for people from refugee backgrounds<br>Interviews conducted by a master's student | 4 UAMs (1F)<br>16-17 years old<br>Sudan, Vietnam, Albania<br>PTSD | CRIES-8, CPSS-5 Interviews | Understanding PTSD, integrating trauma in life narrative, increased self-efficacy and expression, decreased symptomatology, post-traumatic growth | Small sample size<br>Mainly male participants<br>Not randomly recruited<br>Limited generalizability<br>No control group<br>No comparison with placebo or another intervention<br>Only self-report measures<br>No culturally validated measures<br>Language barriers<br>Participants were at different stages of their treatment when interviews were conducted<br>Participants knew of their therapist's involvement in the study |
|------------------------|-------------------------------------------------------|------------------------------------|--------------------|----------------------------------------------------------------------------------------------|-------------------------------------------------------------------|----------------------------|---------------------------------------------------------------------------------------------------------------------------------------------------|-----------------------------------------------------------------------------------------------------------------------------------------------------------------------------------------------------------------------------------------------------------------------------------------------------------------------------------------------------------------------------------------------------------------------------------|

### Transcultural interventions

|                               |                                                             |                                                                                                                                     |                                               |                                                                                                                                      |                                                                                                                                                                               |                                                                                                                           |                                                                                                                                                                                                                                     |                                                                                                                                                                                                                                         |
|-------------------------------|-------------------------------------------------------------|-------------------------------------------------------------------------------------------------------------------------------------|-----------------------------------------------|--------------------------------------------------------------------------------------------------------------------------------------|-------------------------------------------------------------------------------------------------------------------------------------------------------------------------------|---------------------------------------------------------------------------------------------------------------------------|-------------------------------------------------------------------------------------------------------------------------------------------------------------------------------------------------------------------------------------|-----------------------------------------------------------------------------------------------------------------------------------------------------------------------------------------------------------------------------------------|
| Radjack et al. (2020), France | Thematic analysis<br>Narrative and transcultural approaches | A participative action research programme to transmit cultural competence to social workers who provide care for UAMs<br>Individual | Professionals' training<br>Trauma improvement | University hospital<br>Psychiatric department for children and adolescents<br>Meetings were conducted by mental health professionals | 29 UAM (3F)<br>16-18 years old<br>Sub-Saharan Africa, North Africa, and Southern Asia<br>PTSD, depression, addictions, somatic complaints ( <i>n</i> =8)<br>29 Social Workers | Semi-structured interviews (2 to 3 interviews per dyad)<br>Three tools (objects, the circle test, and cultural mediators) | Understanding the experience of being a UAM ( <i>A suspended future/ religion as guarantee of continuity/ preserving one's dignity/ difficulty of escaping a sense of loneliness</i> )<br>Promoting changes in the youth and in the | Small sample size<br>Mainly male participants<br>Not randomly recruited<br>Limited generalizability<br>No control group<br>No comparison with placebo or another intervention<br>No standardised measures of mental health and progress |
|-------------------------------|-------------------------------------------------------------|-------------------------------------------------------------------------------------------------------------------------------------|-----------------------------------------------|--------------------------------------------------------------------------------------------------------------------------------------|-------------------------------------------------------------------------------------------------------------------------------------------------------------------------------|---------------------------------------------------------------------------------------------------------------------------|-------------------------------------------------------------------------------------------------------------------------------------------------------------------------------------------------------------------------------------|-----------------------------------------------------------------------------------------------------------------------------------------------------------------------------------------------------------------------------------------|

|                               |                                                                      |                                                                                                                                                           |                                               |                                                                                                                                      |                                                                                                                                                                                                                                      |                                                                                                                           |                                                                                                                                                                                                                                                                                                                                                                                                                                                                     |                                                                                                                                                                                                                                                              |
|-------------------------------|----------------------------------------------------------------------|-----------------------------------------------------------------------------------------------------------------------------------------------------------|-----------------------------------------------|--------------------------------------------------------------------------------------------------------------------------------------|--------------------------------------------------------------------------------------------------------------------------------------------------------------------------------------------------------------------------------------|---------------------------------------------------------------------------------------------------------------------------|---------------------------------------------------------------------------------------------------------------------------------------------------------------------------------------------------------------------------------------------------------------------------------------------------------------------------------------------------------------------------------------------------------------------------------------------------------------------|--------------------------------------------------------------------------------------------------------------------------------------------------------------------------------------------------------------------------------------------------------------|
|                               |                                                                      | 3 monthly meetings                                                                                                                                        |                                               |                                                                                                                                      |                                                                                                                                                                                                                                      |                                                                                                                           | relationship between the youth and the social worker ( <i>Taking into account the experiences before, during, and after migration/ from "I" to "we"/ a mediator that facilitates bridges between the cultural worlds</i> )                                                                                                                                                                                                                                          | 8 UAMs who were lost to follow-up and had only a single interview are included in the analysis                                                                                                                                                               |
| Radjack et al. (2021), France | Thematic analysis<br>Further analysis of Radjack et al. (2020) study | A participative action research programme to transmit cultural competence to social workers who provide care for UAMs<br>Individual<br>3 monthly meetings | Professionals' training<br>Trauma improvement | University hospital<br>Psychiatric department for children and adolescents<br>Meetings were conducted by mental health professionals | 17 UAMs (3F)<br>15 attended all sessions<br>17-18 years old<br>Sub-Saharan Africa, North Africa, and Southern Asia<br>PTSD, depression, addictions, somatic complaints ( <i>n</i> =7)<br>17 Social Workers<br>Interpreters-mediators | Semi-structured interviews (2 to 3 interviews per dyad)<br>Three tools (objects, the circle test, and cultural mediators) | Enhancement of professionals' cultural competence<br>Re-activation of UAMs' identity construction ( <i>Effective sub-themes for an action modifying the relationship between the young person and the social worker: need to get rid of a sense of helplessness; highlight the minor's ability to connect and not being afraid belonging to a group; give meaning to the journey, such as a rite of passage; assume a maternal position for the social worker</i> ) | Small sample size<br>Mainly male participants<br>Not randomly recruited<br>Limited generalizability<br>No control group<br>No comparison with placebo or another intervention<br>No standardised measures of mental health and progress<br>Loss to follow-up |

#### Case studies/series

#### **CBT-based interventions**

|                             |                                         |                                                                                                       |                    |                                                             |                                                                                                                       |          |                                                                                                                                       |                                                                                                                                                                                                                                                                                                                             |
|-----------------------------|-----------------------------------------|-------------------------------------------------------------------------------------------------------|--------------------|-------------------------------------------------------------|-----------------------------------------------------------------------------------------------------------------------|----------|---------------------------------------------------------------------------------------------------------------------------------------|-----------------------------------------------------------------------------------------------------------------------------------------------------------------------------------------------------------------------------------------------------------------------------------------------------------------------------|
| Bræin et al. (2011), Norway | Case series                             | Multimodal approach:<br>Phase-oriented treatment model, TF-CBT, NET/Kid-NET<br>Individual<br>1 year   | Trauma improvement | Outpatient clinic<br>Sessions conducted by psychologists    | 2 UAMs (M)<br>Afghanistan, Middle East<br>PTSD, Developmental Trauma Disorder, Complicated Grief Disorder             | Leiter-R | Fewer intrusive thoughts, partial improvement in social relationships and academic performance, not fulfilling criteria for diagnosis | Small sample size<br>Only male participants<br>No age indicated<br>Not randomly recruited<br>Limited generalizability<br>No control group<br>No comparison with placebo or another intervention<br>No standardised measures of progress<br>No manual<br>Effects not demonstrated by different investigators<br>No follow-up |
| Franco (2018), USA          | Case study<br>Part of literature review | TF-CBT<br>School-based intervention<br>Individual/Group<br>10-month weekly group meetings, individual | Trauma improvement | Public high school<br>Sessions conducted by a social worker | 1 UAM (F)<br>16 years old<br>Central America<br>Sadness, trouble sleeping, flashbacks of traumatic event, weight loss |          | Improved class effort and school attendance)                                                                                          | Results not generalizable because of single case study<br>Not randomly recruited<br>No control group<br>No comparison with placebo or another intervention<br>No standardised measures of                                                                                                                                   |

|                                            |             |                                                                                  |                                                     |                                                                                   |                                                                                      |                                                                                  |                                                                                                                                                                                                                      |                                                                                                                                                                                                                                                                                                                                                                                                                                                                                                                       |
|--------------------------------------------|-------------|----------------------------------------------------------------------------------|-----------------------------------------------------|-----------------------------------------------------------------------------------|--------------------------------------------------------------------------------------|----------------------------------------------------------------------------------|----------------------------------------------------------------------------------------------------------------------------------------------------------------------------------------------------------------------|-----------------------------------------------------------------------------------------------------------------------------------------------------------------------------------------------------------------------------------------------------------------------------------------------------------------------------------------------------------------------------------------------------------------------------------------------------------------------------------------------------------------------|
|                                            |             | sessions, sessions with the caregiver                                            |                                                     |                                                                                   |                                                                                      |                                                                                  |                                                                                                                                                                                                                      | mental health and progress<br>Effects not demonstrated by different investigators<br>No follow-up<br>Small sample size<br>Mainly male participants<br>Not randomly recruited<br>Limited generalizability<br>No control group<br>No comparison with placebo or another intervention<br>Missing data<br>Attendance rates varied<br>Only self-report measures<br>Conflicting data on cultural validity of SDQ<br>CRIES-8 not culturally validated<br>Effects not demonstrated by different investigators<br>No follow-up |
| King & Said (2019), UK                     | Case study  | Multimodal approach:<br>CBT<br>TF-CBT<br>STAIR<br>CFT<br>Group<br>35 weeks       | Mental health improvement<br>Promotion of wellbeing | NHS, CAMHS for refugees and asylum seekers<br>Sessions conducted by psychologists | 14 UAMs (1F)<br>14-17 years old<br>Afghanistan, Ethiopia, Sudan, Somalia             | Attendance record<br>CGSRS, RCI<br>SDQ, CRIES-8<br>Open discussions for feedback | 4 UAMs showed a reliable improvement in emotional and behavioural wellbeing, but not in risk of self-harm<br>Positive feedback about being part of the group, learning, feeling welcome, respected and less stressed | Small sample size<br>Mainly male participants<br>Not randomly recruited<br>Limited generalizability<br>No control group<br>No comparison with placebo or another intervention<br>Missing data<br>Attendance rates varied<br>Only self-report measures<br>Conflicting data on cultural validity of SDQ<br>CRIES-8 not culturally validated<br>Effects not demonstrated by different investigators<br>No follow-up                                                                                                      |
| Unterhitzenberger et al. (2015), Germany   | Case series | TF-CBT<br>Manualized<br>Individual<br>12-28 sessions                             | Trauma improvement                                  | Trauma Outpatient Clinics<br>Sessions conducted by therapists                     | 6 UAMs (2F)<br>16-18 years old<br>Somalia, Afghanistan, Iran<br>PTSD                 | CAPS-CA, PDS                                                                     | Significant decrease of PTSD symptoms***                                                                                                                                                                             | Small sample size<br>Not randomly recruited<br>Limited generalizability<br>No control group<br>No comparison with placebo or another intervention<br>No culturally validated measures<br>Differences in number of sessions, involvement of caregivers and assessment<br>No follow-up                                                                                                                                                                                                                                  |
| Unterhitzenberger & Rosner (2016), Germany | Case study  | TF-CBT<br>Manualized<br>Individual<br>12 youth sessions<br>12 caregiver sessions | Trauma improvement                                  | Outpatient setting<br>Sessions conducted by a therapist                           | 1 UAM (F)<br>17 years old<br>East Africa<br>PTSD, symptoms of depression and anxiety | CAPS-CA<br>UCLA-PTSD<br>CDI, SCARED                                              | Recovery from PTSD, decrease in anxiety and depression symptoms                                                                                                                                                      | Results not generalizable because of single case study<br>Not randomly recruited<br>Conflicting data on cultural validity of CDI and SCARED<br>UCLA-PTSD not culturally validated<br>Effects not demonstrated by different investigators                                                                                                                                                                                                                                                                              |
| Unterhitzenberger et al. (2019), Germany   | Case study  | TF-CBT<br>Manualized<br>Individual<br>15 sessions                                | Trauma improvement                                  | Outpatient setting<br>Sessions conducted by a therapist                           | 1 UAM (M)<br>17 years old<br>Afghanistan<br>PTSD, major depression                   | CATS                                                                             | Recovery from PTSD                                                                                                                                                                                                   | Results not generalizable because of single case study<br>Not randomly recruited<br>Only self-report measures<br>Conflicting data on cultural validity of CATS<br>Effects not demonstrated by different investigators                                                                                                                                                                                                                                                                                                 |
| Vickers (2005), UK                         | Case study  | CBT<br>Individual<br>16 sessions                                                 | Trauma improvement                                  | CAMHS<br>Sessions conducted by a therapist                                        | 1 UAM (F)<br>14 years old<br>Africa<br>Severe PTSD, mild                             | PDS                                                                              | Decrease in PTSD symptoms                                                                                                                                                                                            | Results not generalizable because of single case study<br>Not randomly recruited                                                                                                                                                                                                                                                                                                                                                                                                                                      |



| Psychodynamic-based interventions |             |                                                                                 |                                              |                                                                                                                                                                    |                                                                                                                                                                    |                                                             |                                                                                                                             | depression                                                                                                                                                                                                                                                                                                              | Only self-report measures<br>No culturally validated measures<br>Effects not demonstrated by different investigators<br>No follow-up |
|-----------------------------------|-------------|---------------------------------------------------------------------------------|----------------------------------------------|--------------------------------------------------------------------------------------------------------------------------------------------------------------------|--------------------------------------------------------------------------------------------------------------------------------------------------------------------|-------------------------------------------------------------|-----------------------------------------------------------------------------------------------------------------------------|-------------------------------------------------------------------------------------------------------------------------------------------------------------------------------------------------------------------------------------------------------------------------------------------------------------------------|--------------------------------------------------------------------------------------------------------------------------------------|
| Cohen & Yadlin (2018), UK         | Case series | Psychodynamic Individual                                                        | Trauma improvement                           | CAMHS Sessions conducted by child psychotherapists                                                                                                                 | 3 UAMs (1F)<br>14-16 years old<br>Episodes of confusion and physical collapse, low mood, recurrent nightmares, excessive sleep and suicidal thoughts, dissociation |                                                             | Sharing feelings more openly, recovering positive sense of self, although feelings of distress and trauma may have remained | Small sample size<br>No country of origin indicated<br>Not randomly recruited<br>Limited generalizability<br>No control group<br>No comparison with placebo or another intervention<br>No standardised measures for mental health and progress<br>No manual<br>No indication of therapy duration<br>No follow-up        |                                                                                                                                      |
| Katsounari (2014), USA            | Case study  | Multimodal approach: Relational psychodynamic, TF-CBT Individual<br>16 sessions | Trauma improvement                           | Locked facility for children who have entered the United States without their parents or documentation<br>Sessions conducted by a therapist                        | 1 UAM (M)<br>16 years old<br>PTSD with dissociative features, major depression                                                                                     | Semi-structured diagnostic biopsychosocial intake interview | Decrease of PTSD symptoms, nightmares, flashbacks, dissociative episodes, feeling safer, better relationships               | Results not generalizable because of single case study<br>Not randomly recruited<br>No standardised measures of mental health and progress<br>No manual<br>Effects not demonstrated by different investigators<br>No follow-up                                                                                          |                                                                                                                                      |
| Melzak (2009), UK                 | Case study  | Multimodal approach: Psychoanalytic - Developmental Individual<br>3 Years       | Trauma improvement                           | The Baobab Centre (non-residential, transitional therapeutic community for children, adolescents and young adults)<br>Sessions conducted by child psychotherapists | 1 young adult- former UAM (M)<br>Africa<br>Sadness, intrusive thoughts, nightmares, suicidal ideas                                                                 |                                                             |                                                                                                                             | Results not generalizable because of single case study<br>No indication of age<br>Not randomly recruited<br>No standardised measures of mental health and progress<br>No manual<br>Effects not demonstrated by different investigators<br>No indication of effects of the intervention on mental health<br>No follow-up |                                                                                                                                      |
| Melzak. (2017), UK                | Case study  | Multimodal approach: Psychoanalytic - Developmental Individual                  | Trauma improvement<br>Promotion of wellbeing | The Baobab Centre<br>Sessions conducted by child psychotherapists                                                                                                  | 1 young adult- former UAM (M)<br>21 years old<br>China<br>Trauma                                                                                                   |                                                             | Recalling repressed feelings of anger after sharing experiences                                                             | Results not generalizable because of single case study<br>Not randomly recruited<br>No standardised measures of mental health and progress<br>No indication of intervention duration<br>No manual<br>Effects not demonstrated by different investigators<br>No follow-up                                                |                                                                                                                                      |

### Narrative-based interventions

|                                           |             |                                                                                      |                                                     |                                                                                                                      |                                                                                                                |                     |                                                                                  |                                                                                                                                                                                                                                                                                                                                  |
|-------------------------------------------|-------------|--------------------------------------------------------------------------------------|-----------------------------------------------------|----------------------------------------------------------------------------------------------------------------------|----------------------------------------------------------------------------------------------------------------|---------------------|----------------------------------------------------------------------------------|----------------------------------------------------------------------------------------------------------------------------------------------------------------------------------------------------------------------------------------------------------------------------------------------------------------------------------|
| Draper et al. (2022), UK                  | Case series | Narrative/social constructionist approach<br>"Continuing Bonds" method<br>Individual | Mental health improvement                           | NHS<br>Sessions conducted by therapists                                                                              | 2 UAMs (M)<br>16/19 years old<br>Anxiety, loss of interest, difficulties in school attendance, migratory grief | Session transcripts | Safety and connectedness through discussing identity, hope, bonds, and time      | Small sample size<br>Only male participants<br>Not randomly recruited<br>No country of origin indicated<br>Limited generalizability<br>No control group<br>No comparison with placebo or another intervention<br>No standardised measures for mental health and progress<br>No manual<br>No follow-up                            |
| Jacobs (2017), Greece                     | Case study  | "The Tree of Life" Group<br>2 sessions                                               | Mental health improvement<br>Promotion of wellbeing | Shelter of PRAKSIS NGO<br>Sessions conducted by a Family Therapist                                                   | 8 UAMs (M)<br>Bangladesh, Pakistan, Afghanistan, Syria, Ghana, Iraq                                            |                     | Connectedness, transformation in how they perceived their problems and hardships | Small sample size<br>Only male participants<br>No age indicated<br>Not randomly recruited<br>Limited generalizability<br>No control group<br>No comparison with placebo or another intervention<br>No standardised measures of mental health and progress<br>Effects not demonstrated by different investigators<br>No follow-up |
| <b>Transcultural interventions</b>        |             |                                                                                      |                                                     |                                                                                                                      |                                                                                                                |                     |                                                                                  |                                                                                                                                                                                                                                                                                                                                  |
| Benoit de Coignac & Baubet (2013), France | Case study  | Transcultural<br>Individual<br>Monthly meetings                                      | Trauma improvement                                  | University hospital<br>Psychiatric department for children and adolescents                                           | 1 UAM (M)<br>17 years old<br>Ivory Coast<br>Mental suffering, possession state                                 |                     | Feeling good during meetings, due to therapists' responses                       | Results not generalizable because of single case study<br>Not randomly recruited<br>No standardised measures of mental health and progress<br>No manual<br>No indication of intervention duration<br>Effects not demonstrated by different investigators<br>No follow-up                                                         |
| Bouaziz et al. (2013), France             | Case study  | Transcultural<br>Individual<br>Monthly meetings                                      | Mental health improvement                           | University hospital<br>Multidisciplinary group of therapists (psychiatrists, psychologists, nurses, anthropologists) | 1 UAM (M)<br>Adolescent<br>Bangladesh<br>Psychotic symptoms, complex PTSD, depression                          |                     |                                                                                  | Results not generalizable because of single case study<br>Not randomly recruited<br>No standardised measures of mental health and progress<br>No indication of intervention duration<br>No manual<br>Effects not demonstrated by different investigators<br>No follow-up                                                         |
| Radjack et al. (2012), France             | Case study  | Transcultural<br>Individual                                                          | Trauma improvement                                  | University hospital<br>Group of therapists                                                                           | 1 UAM (M)<br>17 years old<br>Afghanistan<br>Sadness, withdrawal, distrust                                      |                     | Improvement of self-esteem and confidence                                        | Results not generalizable because of single case study<br>Not randomly recruited<br>No standardised measures of mental health and progress                                                                                                                                                                                       |

|                                                  |            |                                                                       |                                                     |                                                                                                                       |                                                                                                                                                                                              |                          |                                                                                                |                                                                                                                                                                                                                                                                                                                                                              |
|--------------------------------------------------|------------|-----------------------------------------------------------------------|-----------------------------------------------------|-----------------------------------------------------------------------------------------------------------------------|----------------------------------------------------------------------------------------------------------------------------------------------------------------------------------------------|--------------------------|------------------------------------------------------------------------------------------------|--------------------------------------------------------------------------------------------------------------------------------------------------------------------------------------------------------------------------------------------------------------------------------------------------------------------------------------------------------------|
| Touhami et al. (2015), France                    | Case study | Transcultural Individual<br>3 sessions                                | Mental health improvement                           | University hospital<br>Psychiatric department for children and adolescents<br>Multidisciplinary group of therapists   | 1 UAM (M)<br>17 years old<br>Senegal<br>Withdrawal<br>Accompanied by educator                                                                                                                |                          | Increased sense of belonging and possibility of educational re-evaluation                      | No manual<br>No indication of intervention duration<br>Effects not demonstrated by different investigators<br>No follow-up<br>Results not generalizable because of single case study<br>Not randomly recruited<br>No standardised measures of mental health and progress<br>No manual<br>Effects not demonstrated by different investigators<br>No follow-up |
| <b>Other interventions</b>                       |            |                                                                       |                                                     |                                                                                                                       |                                                                                                                                                                                              |                          |                                                                                                |                                                                                                                                                                                                                                                                                                                                                              |
| Alfano et al. (2017), Italy, Switzerland, France | Case study | Photolanguage Group<br>10 weekly sessions                             | Mental health improvement                           | Part of a care and psychological support project for UAMs<br>Sessions conducted by a clinical psychologist            | 5 UAMs (M)<br>15-17 years old<br>Sub-Saharan Africa, Bangladesh<br>Trauma                                                                                                                    | Photographs - discussion | Enabled transformation and change                                                              | Small sample size<br>Not randomly recruited<br>Limited generalizability<br>No control group<br>No comparison with placebo or another intervention<br>No standardized measures of mental health and progress<br>No manual<br>Effects not demonstrated by different investigators<br>No follow-up                                                              |
| Mattenschlager et al. (2016), Germany            | Case study | Psychodrama Individual/Group                                          | Mental health improvement<br>Promotion of wellbeing | Psychological Family- and Life- Counselling Service of Caritas Ulm<br>Sessions conducted by psychotherapists          | <u>Individual</u> : 24 children and young people (2/3 UAMs)<br>Syria, Eritrea, Somalia, Iran, Afghanistan, North Macedonia, Bulgaria<br><u>Group</u> : 4 teenagers (1F)<br>Eritrea<br>Trauma |                          | Improved mental health and development, if combined with stable external conditions            | Small sample size<br>Mainly male participants<br>Not randomly recruited<br>Limited generalizability<br>No control group<br>No comparison with placebo or another intervention<br>No standardised measures of mental health and progress<br>No manual<br>Effects not demonstrated by different investigators<br>No follow-up                                  |
| Mehraby (2002), Australia                        | Case study | Multimodal approach: Model of trauma and recovery Group<br>5 sessions | Trauma improvement                                  | NSW Service for the Treatment and Rehabilitation of Torture and Trauma Survivors<br>Sessions conducted by counsellors | 14 UAMs (3F)<br>12-21 years old<br>Afghanistan<br>Severely traumatized                                                                                                                       |                          | Creation of safe environment for sharing and normalizing experiences, facilitating empowerment | Small sample size<br>Mainly male participants<br>Only from one country<br>Not randomly recruited<br>Limited generalizability<br>No standardised measures of mental health and progress<br>No manual<br>Effects not demonstrated by different investigators<br>No indication of effects of the intervention on mental health                                  |

## Practice papers

## CBT-based interventions

|                                   |                                                                                                            |                                                      |                                                                                                                                                                                                                                          |                                                                                                                                                                                                                                              |               |                                                                                             |                                                                                                                                                                                                                                                               |
|-----------------------------------|------------------------------------------------------------------------------------------------------------|------------------------------------------------------|------------------------------------------------------------------------------------------------------------------------------------------------------------------------------------------------------------------------------------------|----------------------------------------------------------------------------------------------------------------------------------------------------------------------------------------------------------------------------------------------|---------------|---------------------------------------------------------------------------------------------|---------------------------------------------------------------------------------------------------------------------------------------------------------------------------------------------------------------------------------------------------------------|
| Alto et al.<br>(2021), USA        | Multimodal approach:<br>IPT-A, TF-CBT, CBT<br>Individual/Group<br>9 group sessions and individual sessions | Mental health improvement<br>Professionals' training | Congress funded programme run by a MHO for children and families at risk<br>Collaboration with a foster care program, the Department of Human Services case managers, the Expert Agency, and the local school program for newcomer youth | 30 UAMs (F/M)<br><u>Individual</u> : 13 UAMs<br><u>Group</u> : 17 UAMs (6F)<br>15-20 years old<br>Guatemala, Honduras, Mexico, Eritrea, Nepal<br>Trauma, depression<br>Over 90 community partners serving refugees<br>Foster parents of UAMs | Feedback Form | Positive feedback - connection, support, sharing, safety, care, learning helpful strategies | Small sample size<br>Not randomly recruited<br>Limited generalizability<br>No research design<br>No control group<br>No comparison with placebo or another intervention<br>No standardised measures of mental health and progress<br>No follow-up             |
| Simons & Pöter<br>(2017), Germany | Multimodal approach:<br>Metacognitive therapy<br>Pharmacotherapy<br>Individual                             | Mental health improvement                            | Refugee Outpatient Clinic<br>Sessions conducted by psychiatrists                                                                                                                                                                         | UAMs<br>Mainly male<br>12-17 years old<br>Afghanistan, Syria, various African countries<br>PTSD                                                                                                                                              |               | The intervention seems helpful with this target group                                       | Undefined number of participants<br>Not randomly recruited<br>Limited generalizability<br>No research design<br>No control group<br>No comparison with placebo or another treatment<br>No standardised measures of mental health and progress<br>No follow-up |

## Psychodynamic-based interventions

|                   |                                                                                                                         |                        |                                                                   |                                                                 |  |                                                                                                                        |                                                                                                                                                                                                                                                                                     |
|-------------------|-------------------------------------------------------------------------------------------------------------------------|------------------------|-------------------------------------------------------------------|-----------------------------------------------------------------|--|------------------------------------------------------------------------------------------------------------------------|-------------------------------------------------------------------------------------------------------------------------------------------------------------------------------------------------------------------------------------------------------------------------------------|
| Melzak (2018), UK | Multimodal approach:<br>Psychoanalytic-Developmental, ADAPT<br>daily activities, community meetings<br>Individual/Group | Promotion of wellbeing | The Baobab Centre<br>Sessions conducted by Child psychotherapists | 5 UAMs (1F)<br>16-23 years old<br>Middle East, Africa<br>Trauma |  | Possible alleviation of extreme protective defence mechanisms<br>Hope of psychological survival and emotional recovery | Not randomly recruited<br>Limited generalizability<br>No research design<br>No control group<br>No comparison with placebo or another intervention<br>No standardised measures of mental health and progress<br>No manual<br>No indication of intervention duration<br>No follow-up |
|-------------------|-------------------------------------------------------------------------------------------------------------------------|------------------------|-------------------------------------------------------------------|-----------------------------------------------------------------|--|------------------------------------------------------------------------------------------------------------------------|-------------------------------------------------------------------------------------------------------------------------------------------------------------------------------------------------------------------------------------------------------------------------------------|

## Art-based interventions

|                       |                                                                        |                                              |                                                              |                                                                                     |  |                                                                                                                      |                                                                                                                                                                                                                                                                                               |
|-----------------------|------------------------------------------------------------------------|----------------------------------------------|--------------------------------------------------------------|-------------------------------------------------------------------------------------|--|----------------------------------------------------------------------------------------------------------------------|-----------------------------------------------------------------------------------------------------------------------------------------------------------------------------------------------------------------------------------------------------------------------------------------------|
| DeMott (2017), Norway | Expressive Arts in Transition (EXIT) Group<br>10 twice-weekly sessions | Trauma improvement<br>Promotion of wellbeing | Arrival Centre for UAMs<br>Sessions conducted by a therapist | 71 UAMs (M)<br>15-18 years old<br>Mainly Middle East and Africa<br>40% of them PTSD |  | Reduction in posttraumatic stress, anxiety and depression<br>Quality of life and optimism about the future increased | Only male participants<br>Not randomly recruited<br>Limited generalizability<br>No research design<br>No control group<br>No comparison with placebo or another intervention<br>No standardised measures of mental health and progress<br>Effects not demonstrated by different investigators |
|-----------------------|------------------------------------------------------------------------|----------------------------------------------|--------------------------------------------------------------|-------------------------------------------------------------------------------------|--|----------------------------------------------------------------------------------------------------------------------|-----------------------------------------------------------------------------------------------------------------------------------------------------------------------------------------------------------------------------------------------------------------------------------------------|

|                                   |                                                                                                            |                           |                                                                               |                                                                                        |                             |                                                                                                                                                   |                                                                                                                                                                                                                                                                                                                                                                         |
|-----------------------------------|------------------------------------------------------------------------------------------------------------|---------------------------|-------------------------------------------------------------------------------|----------------------------------------------------------------------------------------|-----------------------------|---------------------------------------------------------------------------------------------------------------------------------------------------|-------------------------------------------------------------------------------------------------------------------------------------------------------------------------------------------------------------------------------------------------------------------------------------------------------------------------------------------------------------------------|
| Other interventions               |                                                                                                            |                           |                                                                               |                                                                                        |                             |                                                                                                                                                   | No follow-up                                                                                                                                                                                                                                                                                                                                                            |
| Neurohr & Willner (2019), Germany | Multimodal approach: Psychotherapeutic crisis intervention, Ego-supportive therapeutic approach Individual | Mental health improvement | Initial Reception Centre<br>Sessions conducted by an external psychotherapist | 2 UAMs (M)<br>16-17 years old<br>Afghanistan<br>Post-traumatic and depressive symptoms | CASCAP-D<br>ICD-10 criteria | Reduction of post-traumatic and depressive symptoms, suicidal tendencies, auto-aggressive behaviour, and substance abuse; strengthened ego skills | Small sample size<br>Only male participants from one country<br>Not randomly recruited<br>Limited generalizability<br>No research design<br>No control group<br>No comparison with placebo or another intervention<br>No culturally validated measures<br>No indication of intervention duration<br>Effects not demonstrated by different investigators<br>No follow-up |

*Note:* **ADAPT** = Adaption and Development After Persecution and Trauma model, **AM** = Accompanied Minor, **AUDIT** = Alcohol Use Disorder Identification Test, **BAOS** = Brief Acculturation Orientation Scale, **BSCL** = Brief Symptom Checklist, **BSAS** = Brief Sociocultural Adaptation Scale, **CAMHSRI-REF** = Child and Adolescent Mental Health Service Receipt Inventory adapted for refugee youths, **CAMHS** = Child and Adolescent Mental Health Service, **CAPS-CA** = Clinician Administered PTSD Scale for Children and Adolescents, **CASCAP-D** = Children's Anger Control and Social Problem-Solving Scale, **CATS** = Child and Adolescent Trauma Screen, **CATS-2** = Child and Adolescent Trauma Screen, second version, **CATS-Care** = Child and Adolescent Trauma Screen (caregiver report), **CATS-Self** = Child and Adolescent Trauma Screen (self-report), **CBCL/6-18** = Child Behavior Checklist for Ages 6-18, **CBT** = Cognitive Behavioral Therapy, **CDI** = Children's Depression Inventory, **CDS** = Child Depression Scale, **CFT** = Compassion Focused Therapy, **CGSRS** = Child Group Session Rating Scales, **CHU-9D** = Child Health Utility Instrument, **CLS** = Cantril's Ladder of Life Satisfaction, **CPSS-5** = Child PTSD Symptom Scale for DSM-5, **CPTCI-S** = Child Post-Traumatic Cognitions Inventory, **CRIES** = Child Revised Impact of Events Scale, **CRIES-13** = Child Revised Impact of Events Scale – 13, **C-SSRS** = Columbia-Suicide Severity Rating Scale, **CUDIT-R** = Cannabis Use Disorder Identification Test Revised, **CYWS** = Child and youth welfare service, **DBT** = Dialectical Behavioural Therapy, **DSRS-C** = Birlson Depression Self-Rating Scale for Children, **DSSYR** = Daily Stressors Scale for Young Refugees, **EMAG** = Ethnic Minority Achievement Group, **EQ-5D-3L** = Quality of Life Assessment Scale, **EXIT** = Expressive Arts in Transition, **F** = Female, **GAD-7** = Generalized Anxiety Disorder 7, **GCIC** = Group Climate Instrument for Children, **GSE** = General Self-Efficacy Scale, **HoNOSCA** = Health of the Nation Outcome Scales for Children and Adolescents, **HSCL-25** = Hopkins Symptom Checklist-25, **HTQ** = Harvard Trauma Questionnaire, **IASC** = Inter-Agency Standing Committee, **ICD-10** = International Classification of Diseases 10<sup>th</sup> revision, **IPA** = Interpretative phenomenological analysis, **I-PANAS-SF** = International Positive and Negative Affect Schedule – Short Form, **IPT-A** = Interpersonal Psychotherapy for Adolescents, **Kid-NET** = Narrative Exposure Therapy for Children, **Kinder-DIPS** = Diagnostic Interview for Mental Disorders in Children and Adolescents, **LAO** = Life As Usual, **Leiter-R** = Leiter International Performance Scale – Revised, **M** = Male, **MADR-S** = Montgomery-Asberg Depression Rating Scale, **MHO** = Mental Health Organisation, **MHPSS** = Mental Health Psychosocial Support, **NET** = Narrative Exposure Therapy, **NHS** = National Health System, **PDS** = Posttraumatic Diagnostic Scale, **PHQ-8** = Eight-item Patient Health Questionnaire depression scale, **PHQ-9** = Patient Health Questionnaire-9, **PHQ-A** = The Patient Health Questionnaire-9 modified for Adolescents, **PROTECT Questionnaire** = Detection of mental health problems in asylum seekers by non-health professionals, **PTSD** = Post-Traumatic Stress Disorder, **PTSS** = Post-Traumatic Stress Syndrome, **RCMAS** = Revised Children's Manifest Anxiety Scale, **RCT** = Randomised Controlled Trial, **RHS-15** = Refugee Health Screener - 15, **R-IES** = Revised Impact of Event Scale, **RSES** = Rosenberg Self-Esteem Scale, **RTHC** = Refugee Trauma History Checklist, **SCARED** = Screen for Child Anxiety Related Disorders, **SDQ** = Strengths and Difficulties Questionnaire, **SLE** = Stressful Life Events Checklist, **SSQ** = Social Support Questionnaire, **STAIR** = Skills Training in Affective and Interpersonal Regulation, **TAS-20** = Toronto Alexythymia Scale, **TF-CBT** = Trauma-Focused Cognitive Behavioural Therapy, **Tic-P** = Treatment Inventory of Costs in Psychiatric Patients, **TPT** = Time Perspective Therapy, **TRT** = Teaching Recovery Techniques, **UAM** = Unaccompanied Minor, **UCLA-PTSD** = The University of California at Los Angeles Posttraumatic Stress Disorder Reaction Index for DSM-5, **WHOQOL-BREF** = World Health Organization Quality of Life, brief version, **WTQ** = War Trauma Questionnaire

\*  $p < 0.05$ , \*\*  $p < 0.01$ , \*\*\*  $p < 0.001$
