# Supplementary material for: Psychotherapeutic and Psychosocial Interventions with Unaccompanied Minors: A Scoping Review
Source: MDPI journal article supplement (doi:10.3390/healthcare11060918), 2023-03-22
Supplement: s1 [file s1]

Table S4. Overview of the 16 studies on PSS interventions

| Author(s), Year, Country        | Type of paper/study                    | Type of intervention                                                                                                                                                   | Aim of intervention                 | Setting                                                                                                        | Participants                                                                                                                                                                                                                                           | Measures (if any)                                                                                                             | Results (if any)                                                                                                                                                                                                                                                                                                                                                             | Limitations (if any)                                                                                                                                                                                                                                                                                                                            |
|---------------------------------|----------------------------------------|------------------------------------------------------------------------------------------------------------------------------------------------------------------------|-------------------------------------|----------------------------------------------------------------------------------------------------------------|--------------------------------------------------------------------------------------------------------------------------------------------------------------------------------------------------------------------------------------------------------|-------------------------------------------------------------------------------------------------------------------------------|------------------------------------------------------------------------------------------------------------------------------------------------------------------------------------------------------------------------------------------------------------------------------------------------------------------------------------------------------------------------------|-------------------------------------------------------------------------------------------------------------------------------------------------------------------------------------------------------------------------------------------------------------------------------------------------------------------------------------------------|
| <u>Quantitative studies</u>     |                                        |                                                                                                                                                                        |                                     |                                                                                                                |                                                                                                                                                                                                                                                        |                                                                                                                               |                                                                                                                                                                                                                                                                                                                                                                              |                                                                                                                                                                                                                                                                                                                                                 |
| De Carolis et al. (2019), Italy | Uncontrolled experiment<br>Pilot study | Learning culture-related gestures with Social Robots<br>Individual                                                                                                     | Integration                         | Laboratory setting<br>Intervention conducted by computer scientists                                            | 4 Italian children<br>6-10 years old<br>6 adult migrants<br>19-24 years old                                                                                                                                                                            | A survey composed of 6 statements for evaluating the interaction with the Social Robot, the gesture recognition and execution | The proposed approach is suitable for learning gestures                                                                                                                                                                                                                                                                                                                      | Small sample size<br>Non-representative sample<br>Not randomly recruited<br>Limited generalizability<br>No control group<br>No comparison with placebo or another intervention<br>Effects not demonstrated by different investigators<br>No culturally validated measures<br>No baseline assessment<br>Only descriptive results<br>No follow-up |
| De Carolis et al. (2021), Italy | Uncontrolled experiment<br>Pilot study | Learning culture-related gestures with Social Robots<br>Comparison of new robot (“Nao”) with the previous one (“Pepper”) – see De Carolis et al., (2019)<br>Individual | Integration                         | Laboratory setting<br>Intervention conducted by computer scientists                                            | 10 Italian children<br>6-10 years old                                                                                                                                                                                                                  | A survey composed of 6 statements for evaluating the interaction with the Social Robot, the gesture recognition and execution | The proposed approach is suitable for learning gestures<br>The interaction with Pepper was better evaluated than the one with Nao for the learning gesture task***                                                                                                                                                                                                           | Small sample size<br>Non-representative sample<br>Not randomly recruited<br>Limited generalizability<br>No control group<br>Comparison with an intervention of a previous study- Not matched samples<br>Effects not demonstrated by different investigators<br>No culturally validated measures<br>No follow-up                                 |
| <u>Mixed-method studies</u>     |                                        |                                                                                                                                                                        |                                     |                                                                                                                |                                                                                                                                                                                                                                                        |                                                                                                                               |                                                                                                                                                                                                                                                                                                                                                                              |                                                                                                                                                                                                                                                                                                                                                 |
| Alarcón et al. (2021), Spain    | Controlled study                       | A mentoring programme for self-esteem, resilience and hope improvement<br>Individual<br>1 weekly meeting for 6 months                                                  | Wellbeing<br>Empowerment<br>Support | Punt de Referència Association, Barcelona metropolitan area<br>Mentoring conducted by trained adult volunteers | <u>Quantitative:</u><br>44 UAMs (2F)<br>17-23 years old<br>Morocco, Algeria, Sub-Saharan countries, Latin America<br><i>Mentoring:</i> n=21<br><i>Control:</i> n=23<br><u>Qualitative:</u><br>10 mentees, their 10 mentors, and 10 non-mentored youths | RSE, CYRM-12<br>CHS, K10<br>Scale for educational aspirations<br>Semi-structured interviews                                   | <b>-Self-esteem:</b><br>Significant increase in mentoring group*<br><b>-Resilience:</b><br>Significant improvement in mentoring group from T1 to T2**<br><b>-Youth hope:</b><br>Significant intervention × time interaction effect*, significantly stronger change in the mentoring group*<br><b>-Psychological distress:</b> No significant findings<br><b>-Educational</b> | Small sample size<br>Mainly male participants<br>Not randomly recruited<br>Limited generalizability<br>RSE and CYRM-12 not culturally validated<br>No manual<br>No significant intervention × time interaction effects for self-esteem and resilience<br>Possible effect of external factors<br>No follow-up                                    |

|                            |                          |                                                                                                                                                                                                  |                                   |                                                                                              |                                                                                                                                        |                                                                                                                                   |                                                                                                                                                                                                                                                                                                                                                                 |                                                                                                                                                                                                                                                                                                                                                              |
|----------------------------|--------------------------|--------------------------------------------------------------------------------------------------------------------------------------------------------------------------------------------------|-----------------------------------|----------------------------------------------------------------------------------------------|----------------------------------------------------------------------------------------------------------------------------------------|-----------------------------------------------------------------------------------------------------------------------------------|-----------------------------------------------------------------------------------------------------------------------------------------------------------------------------------------------------------------------------------------------------------------------------------------------------------------------------------------------------------------|--------------------------------------------------------------------------------------------------------------------------------------------------------------------------------------------------------------------------------------------------------------------------------------------------------------------------------------------------------------|
|                            |                          |                                                                                                                                                                                                  |                                   |                                                                                              |                                                                                                                                        |                                                                                                                                   | <b>aspirations:</b><br>Significant improvement in mentoring group from T1 to T2**<br><b>- Educational expectations:</b><br>Significant improvement in mentoring group from T1 to T2**<br><i>Qualitative:</i> Mentoring as a means for emotional and social support, access to social capital, interest in formal educational paths                              |                                                                                                                                                                                                                                                                                                                                                              |
| Hidalgo et al. (2016), USA | Uncontrolled pilot study | “PATHS to Resilience” project - Enhancing the quality of relationships among staff and UAMs in residential care - addressing the clinical needs of traumatized youth<br>Group<br>2 ½day training | Improvement of caregivers’ skills | Collaboration with four pilot sites<br>Intervention conducted by mental health professionals | 297 staff members<br>55% YCWs<br>45% clinical or administrative residential facility staff- baseline data<br>160 attended the training | TABS, MHCI<br>Andrews & Withey Job Satisfaction Questionnaire<br>Administrative records<br>15 semi-structured in-depth interviews | YCWs reported statistically significant decrease in distress**<br>Staff perceived their residential facility to have a significantly higher level of mental health capacity*<br>Statistically significant improvement in self-reported job satisfaction*<br><i>Qualitative:</i><br>'Playfulness' as a means for communication's improvement and case management | Sample not randomly recruited<br>Limited generalizability<br>No control group<br>No comparison with placebo or another intervention<br>TABS not as sensitive as other measures to post-training effects<br>Unable to test the impact of each intervention component separately<br>Possible effect of funder on participants<br>No direct assessment of youth |

#### Qualitative studies

|                                |                               |                                                                          |                                     |                                                                 |                                                                                                                                                  |                                                                                   |                                                                                                                                                                                      |                                                                                                                                                                                                                                                                                                                                                                                                                       |
|--------------------------------|-------------------------------|--------------------------------------------------------------------------|-------------------------------------|-----------------------------------------------------------------|--------------------------------------------------------------------------------------------------------------------------------------------------|-----------------------------------------------------------------------------------|--------------------------------------------------------------------------------------------------------------------------------------------------------------------------------------|-----------------------------------------------------------------------------------------------------------------------------------------------------------------------------------------------------------------------------------------------------------------------------------------------------------------------------------------------------------------------------------------------------------------------|
| Canizales (2015), USA          | Ethnographic research         | "Voces de Esperanza" Group<br>1 two-hour meeting per week                | Wellbeing<br>Empowerment<br>Support | Informal support group<br>Led by two coordinators               | <u>Group:</u> 40 members<br>18-31 years old<br>(former UAMs)<br>Guatemala<br><u>Research participants:</u> 2 group coordinators, 15 members (2F) | Researcher's notes from the group meetings<br>Semi-structured in-depth interviews | Adopt expressive individualism (personal narrative development and self-construction).<br>Shift social commitments (economic attachments, cultural identity, the self as role model) | Small sample size<br>Mainly male participants<br>Only from one country<br>Not randomly recruited<br>Limited generalizability<br>No control group<br>No comparison with placebo or another intervention<br>Effects not demonstrated by different investigators<br>No standardised measures of mental health and progress<br>No manual<br>No follow-up<br>Small sample size<br>Only participants from African countries |
| Clacherty (2021), South Africa | Art-based, narrative research | "The suitcase project"<br>An art-based project for war-affected children | Wellbeing<br>Empowerment<br>Support | Initially an informal group run voluntarily by a child research | 27 UAMs<br>(just over 1/3F)<br>6-18 years old                                                                                                    | Transcripts of the group discussions and artwork                                  | Meaning making<br>Self-expression through art                                                                                                                                        |                                                                                                                                                                                                                                                                                                                                                                                                                       |

|                                |                                          |                                                                                                                                                                                                |                                                    |                                                                                                                               |                                                                                                                                                                                                           |                                                   |                                                                                                                                                                                                                                                                                                                                                                                                                             |                                                                                                                                                                                                                                                                                                                                                                          |
|--------------------------------|------------------------------------------|------------------------------------------------------------------------------------------------------------------------------------------------------------------------------------------------|----------------------------------------------------|-------------------------------------------------------------------------------------------------------------------------------|-----------------------------------------------------------------------------------------------------------------------------------------------------------------------------------------------------------|---------------------------------------------------|-----------------------------------------------------------------------------------------------------------------------------------------------------------------------------------------------------------------------------------------------------------------------------------------------------------------------------------------------------------------------------------------------------------------------------|--------------------------------------------------------------------------------------------------------------------------------------------------------------------------------------------------------------------------------------------------------------------------------------------------------------------------------------------------------------------------|
|                                |                                          | and young people who cross borders<br>Group                                                                                                                                                    |                                                    | practitioner and an artist at a local school of Johannesburg                                                                  | Rwanda, Burundi, DRC, Zimbabwe, Ethiopia, Angola                                                                                                                                                          |                                                   | Apprehend their own strength and agency                                                                                                                                                                                                                                                                                                                                                                                     | Not randomly recruited<br>Limited generalizability<br>No control group<br>No comparison with placebo or another intervention<br>Effects not demonstrated by different investigators<br>No standardised measures of mental health and progress<br>No indication of intervention duration<br>No follow-up<br>Small sample size<br>Only participants from African countries |
| Kakowa & Kaomba (2020), Malawi | Content and thematic analysis            | Kinship care system for PSS<br>Various methods:<br>1. "Tumbo moja" (Bereavement counselling)<br>2. "Watoto Wazuri" (Advice for a good life)<br>3. Counselling and guidance<br>Individual/Group | Wellbeing<br>Empowerment<br>Support                | Refugee Camp Interventions conducted by community members                                                                     | 20 UAMs<br>Burundi, Rwanda, Somalia, DRC<br><u>Focus group 1:</u><br>n=10 (6F), 12-14 years old<br><u>Focus group 2:</u><br>n=7 (4F), 15-18 years old<br>8 key informants<br>5 families (32-55 years old) | Focus group interviews<br>In-depth key interviews | Fewer developmental or behavioural problems, placement stability, safety, permanent contact with relatives, sharing of experiences, in most cases                                                                                                                                                                                                                                                                           | Limited generalizability<br>No control group<br>No comparison with placebo or another intervention<br>No standardised measures of mental health and progress<br>No manual<br>No follow-up<br>Small sample size<br>Only male participants from two countries                                                                                                              |
| Rogers et al. (2018), UK       | Thematic analysis                        | Community based participatory research- Photovoice<br>Group<br>6 activity sessions<br>1 focus group with foster carers                                                                         | Improvement of caregivers' skills                  | Collaboration between the university and a fostering service<br>Sessions conducted by social scientists                       | 7 UAMs (M)<br>16-17 years old<br>Afghanistan, Albania<br>6 carers                                                                                                                                         | Photographs<br>Focus group                        | Themes of UAM's images:<br><i>Ordinary experiences in extraordinary circumstances</i><br><i>Building relationships</i><br>Themes of Foster carers focus group:<br><i>Concerns about meeting children's cultural, religious and linguistic needs</i><br><i>Concerns about radicalisation</i><br><i>Concerns about ages</i><br>At the end of the photo discussions, the foster carers were open to attending further training | Not randomly recruited<br>Limited generalizability<br>No control group<br>No comparison with placebo or another intervention<br>Effects not demonstrated by different investigators<br>No standardised measures of mental health and progress<br>No manual<br>No follow-up                                                                                               |
| <hr/>                          |                                          |                                                                                                                                                                                                |                                                    |                                                                                                                               |                                                                                                                                                                                                           |                                                   |                                                                                                                                                                                                                                                                                                                                                                                                                             |                                                                                                                                                                                                                                                                                                                                                                          |
| Magnano & Andrea (2019), Italy | <u>Case studies/series</u><br>Case study | Career Guidance<br>Individual/Group<br>7 meetings (6 in group setting, 1 in individual setting)                                                                                                | Integration<br>Wellbeing<br>Empowerment<br>Support | Host Community for UAMs<br>Sessions conducted by a career counsellor, with the support of a cultural mediator and/or educator | 14 UAMs (M)<br>14-18 years old<br>Ivory Coast, Gambia, Senegal, Ghana, Guinea-Conakry, Republic of                                                                                                        | Semi-structured interviews<br>3IP                 | Improvement of knowledge and interests regarding work, labour market, professions, change in definitions of work and decent work                                                                                                                                                                                                                                                                                            | Small sample size<br>Only male participants from African countries<br>Not randomly recruited<br>Limited generalizability<br>No control group<br>No comparison with placebo or                                                                                                                                                                                            |

| Table 1. Summary of the studies included in the meta-analysis |              |                                                                                                                                                                                                 |                                                                    |                                                                                                                                                                                                           |                                                                                                                                                                                                                                        |                                                                                                                                                                                                                                                   |                                                                                                          |                                                                                                                                                                                                                                                                                                                                                                                                                                                                                                                                                                                                                                                                                                                                                                                                                                                                                                                                                                     |
|---------------------------------------------------------------|--------------|-------------------------------------------------------------------------------------------------------------------------------------------------------------------------------------------------|--------------------------------------------------------------------|-----------------------------------------------------------------------------------------------------------------------------------------------------------------------------------------------------------|----------------------------------------------------------------------------------------------------------------------------------------------------------------------------------------------------------------------------------------|---------------------------------------------------------------------------------------------------------------------------------------------------------------------------------------------------------------------------------------------------|----------------------------------------------------------------------------------------------------------|---------------------------------------------------------------------------------------------------------------------------------------------------------------------------------------------------------------------------------------------------------------------------------------------------------------------------------------------------------------------------------------------------------------------------------------------------------------------------------------------------------------------------------------------------------------------------------------------------------------------------------------------------------------------------------------------------------------------------------------------------------------------------------------------------------------------------------------------------------------------------------------------------------------------------------------------------------------------|
| Author (Year)                                                 | Study Design | Intervention                                                                                                                                                                                    | Comparison                                                         | Setting                                                                                                                                                                                                   | Participants                                                                                                                                                                                                                           | Intervention                                                                                                                                                                                                                                      | Comparison                                                                                               | Outcomes                                                                                                                                                                                                                                                                                                                                                                                                                                                                                                                                                                                                                                                                                                                                                                                                                                                                                                                                                            |
| Nelson et al. (2016), Australia                               | Case study   | A model of social work with UAMs (critical social analysis, counselling, advocacy, social activism)<br>Individual                                                                               | Wellbeing Empowerment Support                                      | Community Detention house<br>Sessions conducted by a social worker                                                                                                                                        | 1 UAM (M)<br>15 years old<br>Afghanistan<br>Poor sleep, nightmares, anger, withdrawal, irregular school attendance, physical evidence of torture                                                                                       |                                                                                                                                                                                                                                                   | during intervention<br>At follow-up, positive influence of counselling only for the younger participants | another intervention<br>Effects not demonstrated by different investigators<br>No standardised measures of mental health and progress<br>No manual<br>Follow-up only with some participants<br>Possible effects of external factors at follow-up<br>Results not generalizable because of single case study<br>Not randomly recruited<br>No research design<br>No control group<br>No comparison with placebo or another intervention<br>Effects not demonstrated by different investigators<br>No standardised measures of mental health and progress<br>No manual<br>No follow-up<br>No indication of specific results and effects of the intervention<br>Undefined demographics and/or number of participants<br>Sample not randomly recruited<br>Limited generalizability<br>No research design<br>No control group<br>No comparison with placebo or another intervention<br>No standardised measures of mental health and progress<br>No manual<br>No follow-up |
| Rania et al. (2018), Italy                                    | Case study   | Three new second-level models of intervention for the care of unaccompanied migrant minors:<br>1. "Safeguard Elfo"<br>2. "Apartments for Autonomy"<br>3. "Diffused Network"<br>Individual/Group | Improvement of caregivers' skills<br>Wellbeing Empowerment Support | Involved agencies: Regions, municipalities, courts, Defence for Children Italy, Third sector organizations, volunteer guardians and foster families, community centres, social services, foster families. | 1. "Safeguard Elfo": 114 volunteer guardians, 7 UAMs<br>2. "Apartments for Autonomy": 366 UAMs and young adults<br>3. "Diffused Networks": UAMs and young adults, 9 male migrants and 3 mother-child dyads<br>Staff members of the NGO | Secondary data that the representatives of the intervention projects shared with the researchers<br>Semi-structured interviews with key informants (projects representatives, social workers, educators, volunteer guardians, and foster mothers) | Bringing the host population closer to minors<br>Developing individual autonomy                          | Results not generalizable because of single case study<br>Not randomly recruited<br>No research design<br>No control group<br>No comparison with placebo or another intervention<br>Effects not demonstrated by different investigators<br>No standardised measures of mental health and progress<br>No manual<br>No follow-up                                                                                                                                                                                                                                                                                                                                                                                                                                                                                                                                                                                                                                      |
| Tyminski (2018), Germany                                      | Case study   | An organizational consultation for an NGO that handles placements for UAMs<br>Group<br>1 day                                                                                                    | Improvement of caregivers' skills                                  | NGO that handles placements for UAMs<br>Consultation conducted by a mental health professional                                                                                                            |                                                                                                                                                                                                                                        | Feedback from the staff                                                                                                                                                                                                                           | Identification of helpful mentoring strategies                                                           | Results not generalizable because of single case study<br>Not randomly recruited<br>No research design<br>No control group<br>No comparison with placebo or another intervention<br>Effects not demonstrated by different investigators<br>No standardised measures of mental health and progress<br>No manual<br>No follow-up                                                                                                                                                                                                                                                                                                                                                                                                                                                                                                                                                                                                                                      |

## Practice papers

|                                       |                   |                                                                                                                                                                                                                                     |                                     |                                                                                                                                                   |                                                                                 |                                                                      |                                                                                                                                    |                                                                                                                                                                                                                                                                                                                                                        |
|---------------------------------------|-------------------|-------------------------------------------------------------------------------------------------------------------------------------------------------------------------------------------------------------------------------------|-------------------------------------|---------------------------------------------------------------------------------------------------------------------------------------------------|---------------------------------------------------------------------------------|----------------------------------------------------------------------|------------------------------------------------------------------------------------------------------------------------------------|--------------------------------------------------------------------------------------------------------------------------------------------------------------------------------------------------------------------------------------------------------------------------------------------------------------------------------------------------------|
| Alem et al.<br>(2021), Ethiopia       |                   | A multipronged approach for prevention, intervention, and postvention of suicidal incidents<br>Individual/Group<br><u>Psychoeducation</u> : 1-3 sessions<br><u>Group counselling</u> : 10 sessions<br><u>Individual counselling</u> | Wellbeing<br>Empowerment<br>Support | Refugee Camp<br>Intervention conducted by selected counsellors with prior experience in working with children and trained staff members of an NGO | 1174 minors<br>(398 F)<br>78% completed<br>≥7 group sessions<br>Eritrea         | Feedback from the field                                              | Reduction in psychological, somatic and/or behavioural symptoms of distress in 92.5% of those who completed the 6-month assessment | Participants only from one country<br>No age indicated<br>Not randomly recruited<br>Limited generalizability<br>No research design<br>No control group<br>No comparison with placebo or another intervention<br>No standardised measures of mental health and progress                                                                                 |
| Burck & Hughes<br>(2018), UK          |                   | Psychosocial and therapeutic support (systemic–narrative practice and community/liberation psychology)<br>Individual/Group                                                                                                          | Wellbeing<br>Empowerment<br>Support | Refugee Camp<br>Intervention conducted by systemic family therapists and clinical psychologists                                                   | UAMs, women, children and their families and many volunteers at the Calais camp | Feedback from the field                                              | Witnessing, naming and acknowledging injustices<br>Promotion of solidarity                                                         | Undefined number and demographics of participants<br>Not randomly recruited<br>Limited generalizability<br>No research design<br>No control group<br>No comparison with placebo or another intervention<br>No standardised measures of mental health and progress<br>No manual<br>No indication of intervention duration<br>No follow-up               |
| Clacherty (2015),<br>South Africa     |                   | "The suitcase project"<br>An art-based project for war-affected children and young people who cross borders<br>Group                                                                                                                | Wellbeing<br>Empowerment<br>Support | Initially an informal group run voluntarily by a child research practitioner and an artist                                                        | UAMs<br>9-17 years old<br>Burundi, Rwanda, DRC, Angola, Eritrea                 | Transcripts of the group discussions and artwork                     | Meaning making<br>Self-expression through art                                                                                      | Undefined number of participants<br>Participants only from African countries<br>Not randomly recruited<br>Limited generalizability<br>No research design<br>No control group<br>No comparison with placebo or another intervention<br>No standardised measures of mental health and progress<br>No indication of intervention duration<br>No follow-up |
| Estoura & Roberto (2019),<br>Portugal | Practice proposal | The RAISE Model<br>Residential intervention for UAMs, with 5 pillars: Protection and Security; Attachment; Identity (ies); Participation; Citizenship<br>Individual/Group<br>5 months                                               | Wellbeing<br>Empowerment<br>Support | Residential Facility<br>Intervention implemented by residential personnel (including mental health professionals) and external partners           | UAMs                                                                            | Unstructured and in-depth interviews<br>Observation by staff members |                                                                                                                                    | No indication of number, demographics and recruitment method of possible participants<br>No research design<br>No control group<br>No comparison with placebo or another intervention<br>No standardised measures of mental health and progress<br>No follow-up                                                                                        |

*Note:* **3IP** = Iconographic Professional Interests Inventory, **CHS** = Children's Hope Scale, **CYRM-12** = Children and youth resilience measure, **DRC** = Democratic Republic of Congo, **F** = Female, **K10** = Kessler Psychological Distress Scale, **M** = Male, **MHCI** = Mental Health Capacity Instrument, **RSE** = Rosenberg Scale for Self-Esteem, **TABS** = Trauma Attachment Scale, **UAM** = Unaccompanied Minor, **YCWs** = Youth Care Workers

\* $p < 0.05$ , \*\* $p < 0.01$ , \*\*\* $p < 0.001$
